# Supplementary material for: The current status of resistance to alpha-cypermethrin, ivermectin, and amitraz of the cattle tick (Rhipicephalus microplus) in Ecuador
Source: PubMed Central journal article supplement (PMC5384665; doi:10.1371/journal.pone.0174652), 2017-04-07

# Predicted\_dose\_response\_per\_drug.R

*nuinuce*

*Sun Jan 22 19:59:36 2017*

```
##Analysis were based on three different concentrations per acaricide
#i.e. alpha-cypermethrin at 0.002%, 0.02%, and 0.5%; amitraz at 0.002%, 0.1%, and 0.25%
#and ivermectin at 0.01%, 0.1%, and 0.5% for the minimum, medium or discriminatory
#and maximum doses, respectively. In general, the three acaricide products show
#resistance in all levels
```

```
library(drc)
```

```
## Loading required package: MASS
##
## 'drc' has been loaded.
##
## Please cite R and 'drc' if used for a publication,
## for references type 'citation()' and 'citation('drc')'.
##
##
## Attaching package: 'drc'
##
## The following objects are masked from 'package:stats':
##
##   gaussian, getInitial
```

```
Predicdrug<-read.csv("totalresist.csv",header = T,sep = ";", dec = ",")
```

```
Predicdrug
```

```
##           Localidad finca           droga conc totalX
## 1           Los Bancos Fin 1           amitraz 0.002 100.50
## 2           Los Bancos Fin 1           amitraz 0.100  98.75
## 3           Los Bancos Fin 1           amitraz 0.250 100.25
## 4           Los Bancos Fin 1 alpha-cypermethrin 0.002 101.25
## 5           Los Bancos Fin 1 alpha-cypermethrin 0.020 100.50
## 6           Los Bancos Fin 1 alpha-cypermethrin 0.500 107.50
## 7           Los Bancos Fin 1           ivermectin 0.010 101.00
## 8           Los Bancos Fin 1           ivermectin 0.100  88.25
## 9           Los Bancos Fin 1           ivermectin 0.500  89.50
## 10          Los Bancos Fin 2           amitraz 0.002  89.50
## 11          Los Bancos Fin 2           amitraz 0.100 101.50
## 12          Los Bancos Fin 2           amitraz 0.250 101.00
## 13          Los Bancos Fin 2 alpha-cypermethrin 0.002 110.50
## 14          Los Bancos Fin 2 alpha-cypermethrin 0.020 105.00
## 15          Los Bancos Fin 2 alpha-cypermethrin 0.500 106.25
## 16          Los Bancos Fin 2           ivermectin 0.010 100.00
## 17          Los Bancos Fin 2           ivermectin 0.100 101.75
## 18          Los Bancos Fin 2           ivermectin 0.500  80.50
## 19          Los Bancos Fin 3           amitraz 0.002 110.75
```

|       |               |       |                    |       |        |
|-------|---------------|-------|--------------------|-------|--------|
| ## 20 | Los Bancos    | Fin 3 | amitraz            | 0.100 | 119.50 |
| ## 21 | Los Bancos    | Fin 3 | amitraz            | 0.250 | 120.00 |
| ## 22 | Los Bancos    | Fin 3 | alpha-cypermethrin | 0.002 | 109.25 |
| ## 23 | Los Bancos    | Fin 3 | alpha-cypermethrin | 0.020 | 123.75 |
| ## 24 | Los Bancos    | Fin 3 | alpha-cypermethrin | 0.500 | 102.25 |
| ## 25 | Los Bancos    | Fin 3 | ivermectin         | 0.010 | 99.25  |
| ## 26 | Los Bancos    | Fin 3 | ivermectin         | 0.100 | 108.75 |
| ## 27 | Los Bancos    | Fin 3 | ivermectin         | 0.500 | 114.25 |
| ## 28 | Santo Domingo | Fin 4 | amitraz            | 0.002 | 94.75  |
| ## 29 | Santo Domingo | Fin 4 | amitraz            | 0.100 | 95.25  |
| ## 30 | Santo Domingo | Fin 4 | amitraz            | 0.250 | 97.25  |
| ## 31 | Santo Domingo | Fin 4 | alpha-cypermethrin | 0.002 | 92.50  |
| ## 32 | Santo Domingo | Fin 4 | alpha-cypermethrin | 0.020 | 93.75  |
| ## 33 | Santo Domingo | Fin 4 | alpha-cypermethrin | 0.500 | 90.25  |
| ## 34 | Santo Domingo | Fin 4 | ivermectin         | 0.010 | 97.50  |
| ## 35 | Santo Domingo | Fin 4 | ivermectin         | 0.100 | 98.75  |
| ## 36 | Santo Domingo | Fin 4 | ivermectin         | 0.500 | 93.25  |
| ## 37 | El Carmen     | Fin 5 | amitraz            | 0.002 | 95.75  |
| ## 38 | El Carmen     | Fin 5 | amitraz            | 0.100 | 95.00  |
| ## 39 | El Carmen     | Fin 5 | amitraz            | 0.250 | 94.50  |
| ## 40 | El Carmen     | Fin 5 | alpha-cypermethrin | 0.002 | 94.50  |
| ## 41 | El Carmen     | Fin 5 | alpha-cypermethrin | 0.020 | 101.00 |
| ## 42 | El Carmen     | Fin 5 | alpha-cypermethrin | 0.500 | 93.75  |
| ## 43 | El Carmen     | Fin 5 | ivermectin         | 0.010 | 97.50  |
| ## 44 | El Carmen     | Fin 5 | ivermectin         | 0.100 | 95.25  |
| ## 45 | El Carmen     | Fin 5 | ivermectin         | 0.500 | 98.25  |
| ## 46 | El Carmen     | Fin 6 | amitraz            | 0.002 | 106.00 |
| ## 47 | El Carmen     | Fin 6 | amitraz            | 0.100 | 118.25 |
| ## 48 | El Carmen     | Fin 6 | amitraz            | 0.250 | 108.00 |
| ## 49 | El Carmen     | Fin 6 | alpha-cypermethrin | 0.002 | 114.25 |
| ## 50 | El Carmen     | Fin 6 | alpha-cypermethrin | 0.020 | 115.75 |
| ## 51 | El Carmen     | Fin 6 | alpha-cypermethrin | 0.500 | 106.75 |
| ## 52 | El Carmen     | Fin 6 | ivermectin         | 0.010 | 96.50  |
| ## 53 | El Carmen     | Fin 6 | ivermectin         | 0.100 | 101.25 |
| ## 54 | El Carmen     | Fin 6 | ivermectin         | 0.500 | 94.75  |
| ## 55 | El Carmen     | Fin 7 | amitraz            | 0.002 | 96.25  |
| ## 56 | El Carmen     | Fin 7 | amitraz            | 0.100 | 99.00  |
| ## 57 | El Carmen     | Fin 7 | amitraz            | 0.250 | 92.50  |
| ## 58 | El Carmen     | Fin 7 | alpha-cypermethrin | 0.002 | 121.75 |
| ## 59 | El Carmen     | Fin 7 | alpha-cypermethrin | 0.020 | 92.50  |
| ## 60 | El Carmen     | Fin 7 | alpha-cypermethrin | 0.500 | 93.00  |
| ## 61 | El Carmen     | Fin 7 | ivermectin         | 0.010 | 83.25  |
| ## 62 | El Carmen     | Fin 7 | ivermectin         | 0.100 | 100.25 |
| ## 63 | El Carmen     | Fin 7 | ivermectin         | 0.500 | 95.00  |
| ## 64 | Santo Domingo | Fin 8 | amitraz            | 0.002 | 102.25 |
| ## 65 | Santo Domingo | Fin 8 | amitraz            | 0.100 | 114.50 |
| ## 66 | Santo Domingo | Fin 8 | amitraz            | 0.250 | 107.75 |
| ## 67 | Santo Domingo | Fin 8 | alpha-cypermethrin | 0.002 | 106.25 |
| ## 68 | Santo Domingo | Fin 8 | alpha-cypermethrin | 0.020 | 120.00 |
| ## 69 | Santo Domingo | Fin 8 | alpha-cypermethrin | 0.500 | 106.75 |
| ## 70 | Santo Domingo | Fin 8 | ivermectin         | 0.010 | 112.75 |
| ## 71 | Santo Domingo | Fin 8 | ivermectin         | 0.100 | 118.75 |
| ## 72 | Santo Domingo | Fin 8 | ivermectin         | 0.500 | 106.75 |
| ## 73 | Santo Domingo | Fin 9 | amitraz            | 0.002 | 117.50 |

|        |                         |        |                    |       |        |
|--------|-------------------------|--------|--------------------|-------|--------|
| ## 74  | Santo Domingo           | Fin 9  | amitraz            | 0.100 | 106.75 |
| ## 75  | Santo Domingo           | Fin 9  | amitraz            | 0.250 | 110.75 |
| ## 76  | Santo Domingo           | Fin 9  | alpha-cypermethrin | 0.002 | 126.50 |
| ## 77  | Santo Domingo           | Fin 9  | alpha-cypermethrin | 0.020 | 107.50 |
| ## 78  | Santo Domingo           | Fin 9  | alpha-cypermethrin | 0.500 | 118.25 |
| ## 79  | Santo Domingo           | Fin 9  | ivermectin         | 0.010 | 117.25 |
| ## 80  | Santo Domingo           | Fin 9  | ivermectin         | 0.100 | 116.75 |
| ## 81  | Santo Domingo           | Fin 9  | ivermectin         | 0.500 | 114.50 |
| ## 82  | Pedro Vicente Maldonado | Fin 10 | amitraz            | 0.002 | 102.25 |
| ## 83  | Pedro Vicente Maldonado | Fin 10 | amitraz            | 0.100 | 107.50 |
| ## 84  | Pedro Vicente Maldonado | Fin 10 | amitraz            | 0.250 | 117.25 |
| ## 85  | Pedro Vicente Maldonado | Fin 10 | alpha-cypermethrin | 0.002 | 108.75 |
| ## 86  | Pedro Vicente Maldonado | Fin 10 | alpha-cypermethrin | 0.020 | 112.00 |
| ## 87  | Pedro Vicente Maldonado | Fin 10 | alpha-cypermethrin | 0.500 | 105.75 |
| ## 88  | Pedro Vicente Maldonado | Fin 10 | ivermectin         | 0.010 | 120.25 |
| ## 89  | Pedro Vicente Maldonado | Fin 10 | ivermectin         | 0.100 | 109.25 |
| ## 90  | Pedro Vicente Maldonado | Fin 10 | ivermectin         | 0.500 | 106.50 |
| ## 91  | Pedro Vicente Maldonado | Fin 11 | amitraz            | 0.002 | 111.00 |
| ## 92  | Pedro Vicente Maldonado | Fin 11 | amitraz            | 0.100 | 106.25 |
| ## 93  | Pedro Vicente Maldonado | Fin 11 | amitraz            | 0.250 | 110.50 |
| ## 94  | Pedro Vicente Maldonado | Fin 11 | alpha-cypermethrin | 0.002 | 78.00  |
| ## 95  | Pedro Vicente Maldonado | Fin 11 | alpha-cypermethrin | 0.020 | 109.00 |
| ## 96  | Pedro Vicente Maldonado | Fin 11 | alpha-cypermethrin | 0.500 | 99.50  |
| ## 97  | Pedro Vicente Maldonado | Fin 11 | ivermectin         | 0.010 | 113.25 |
| ## 98  | Pedro Vicente Maldonado | Fin 11 | ivermectin         | 0.100 | 98.00  |
| ## 99  | Pedro Vicente Maldonado | Fin 11 | ivermectin         | 0.500 | 107.00 |
| ## 100 | Pedro Vicente Maldonado | Fin 12 | amitraz            | 0.002 | 111.50 |
| ## 101 | Pedro Vicente Maldonado | Fin 12 | amitraz            | 0.100 | 118.00 |
| ## 102 | Pedro Vicente Maldonado | Fin 12 | amitraz            | 0.250 | 124.50 |
| ## 103 | Pedro Vicente Maldonado | Fin 12 | alpha-cypermethrin | 0.002 | 84.75  |
| ## 104 | Pedro Vicente Maldonado | Fin 12 | alpha-cypermethrin | 0.020 | 122.25 |
| ## 105 | Pedro Vicente Maldonado | Fin 12 | alpha-cypermethrin | 0.500 | 107.00 |
| ## 106 | Pedro Vicente Maldonado | Fin 12 | ivermectin         | 0.010 | 99.25  |
| ## 107 | Pedro Vicente Maldonado | Fin 12 | ivermectin         | 0.100 | 125.75 |
| ## 108 | Pedro Vicente Maldonado | Fin 12 | ivermectin         | 0.500 | 109.50 |
| ##     | muertosX                | vivosX |                    |       |        |
| ## 1   | 44.75                   | 55.75  |                    |       |        |
| ## 2   | 54.00                   | 44.75  |                    |       |        |
| ## 3   | 72.50                   | 27.75  |                    |       |        |
| ## 4   | 92.00                   | 9.25   |                    |       |        |
| ## 5   | 90.25                   | 10.25  |                    |       |        |
| ## 6   | 106.00                  | 1.50   |                    |       |        |
| ## 7   | 59.00                   | 42.00  |                    |       |        |
| ## 8   | 57.25                   | 31.00  |                    |       |        |
| ## 9   | 61.75                   | 27.75  |                    |       |        |
| ## 10  | 87.00                   | 2.50   |                    |       |        |
| ## 11  | 96.00                   | 5.50   |                    |       |        |
| ## 12  | 98.25                   | 2.75   |                    |       |        |
| ## 13  | 72.00                   | 38.50  |                    |       |        |
| ## 14  | 84.25                   | 20.75  |                    |       |        |
| ## 15  | 90.50                   | 15.75  |                    |       |        |
| ## 16  | 54.00                   | 46.00  |                    |       |        |
| ## 17  | 58.50                   | 43.25  |                    |       |        |
| ## 18  | 54.00                   | 26.50  |                    |       |        |

|       |        |        |
|-------|--------|--------|
| ## 19 | 15.00  | 95.75  |
| ## 20 | 19.50  | 100.00 |
| ## 21 | 26.25  | 93.75  |
| ## 22 | 103.00 | 6.25   |
| ## 23 | 118.75 | 5.00   |
| ## 24 | 98.25  | 4.00   |
| ## 25 | 10.75  | 88.50  |
| ## 26 | 21.50  | 87.25  |
| ## 27 | 31.75  | 82.50  |
| ## 28 | 49.25  | 45.50  |
| ## 29 | 48.00  | 47.25  |
| ## 30 | 47.75  | 49.50  |
| ## 31 | 43.25  | 49.25  |
| ## 32 | 43.50  | 50.25  |
| ## 33 | 87.00  | 3.25   |
| ## 34 | 95.25  | 2.25   |
| ## 35 | 95.75  | 3.00   |
| ## 36 | 91.50  | 1.75   |
| ## 37 | 64.00  | 31.75  |
| ## 38 | 72.00  | 23.00  |
| ## 39 | 76.25  | 18.25  |
| ## 40 | 77.75  | 16.75  |
| ## 41 | 88.75  | 12.25  |
| ## 42 | 86.25  | 7.50   |
| ## 43 | 86.75  | 10.75  |
| ## 44 | 86.50  | 8.75   |
| ## 45 | 92.00  | 6.25   |
| ## 46 | 48.25  | 57.75  |
| ## 47 | 56.75  | 61.50  |
| ## 48 | 59.00  | 49.00  |
| ## 49 | 86.25  | 28.00  |
| ## 50 | 92.00  | 23.75  |
| ## 51 | 98.25  | 8.50   |
| ## 52 | 93.00  | 3.50   |
| ## 53 | 98.25  | 3.00   |
| ## 54 | 93.25  | 1.50   |
| ## 55 | 80.25  | 16.00  |
| ## 56 | 83.25  | 15.75  |
| ## 57 | 82.00  | 10.50  |
| ## 58 | 92.00  | 29.75  |
| ## 59 | 89.00  | 3.50   |
| ## 60 | 89.00  | 4.00   |
| ## 61 | 78.25  | 5.00   |
| ## 62 | 93.50  | 6.75   |
| ## 63 | 93.75  | 1.25   |
| ## 64 | 92.75  | 10.75  |
| ## 65 | 104.75 | 9.75   |
| ## 66 | 104.75 | 3.00   |
| ## 67 | 103.75 | 2.50   |
| ## 68 | 115.25 | 4.75   |
| ## 69 | 104.25 | 2.50   |
| ## 70 | 111.00 | 1.75   |
| ## 71 | 117.75 | 1.00   |
| ## 72 | 106.25 | 0.50   |

```
## 73      50.25  67.25
## 74      54.00  52.75
## 75      61.00  49.75
## 76     122.25   4.25
## 77     105.75   1.75
## 78     116.75   1.50
## 79      59.00  58.25
## 80      64.50  52.25
## 81      75.50  39.00
## 82      99.50   2.75
## 83     104.75   2.75
## 84     115.25   2.00
## 85      52.50  56.25
## 86      95.75  16.25
## 87     102.75   3.00
## 88     118.75   1.50
## 89     108.00   1.25
## 90     106.00   0.50
## 91      67.50  43.50
## 92      71.00  35.25
## 93      84.00  26.50
## 94      77.00   1.00
## 95     107.50   1.50
## 96      98.75   0.75
## 97     110.75   2.50
## 98      96.25   1.75
## 99     105.75   1.25
## 100     93.75  17.75
## 101     107.50  10.50
## 102     116.00   8.50
## 103     82.75   2.00
## 104     120.25   2.00
## 105     105.75   1.25
## 106     85.50  13.75
## 107     110.00  15.75
## 108     95.75  13.75
```

```
Predicdrug.ll<-drm(vivosX/totalX~conc, droga, data=Predicdrug, fct = LL.5(), weights = totalX, type="b
op <- par(mfrow = c(1, 1))

plot(Predicdrug.ll,broken = T,xlab = "concentrations (%)",
      xlim = range(Predicdrug$conc), ylim = c(0,0.4), ylab = "Resistance (%)", col=c("red", "black", "blue"),
      cex.legend = 0.7, lty=1, lwd=1)
```

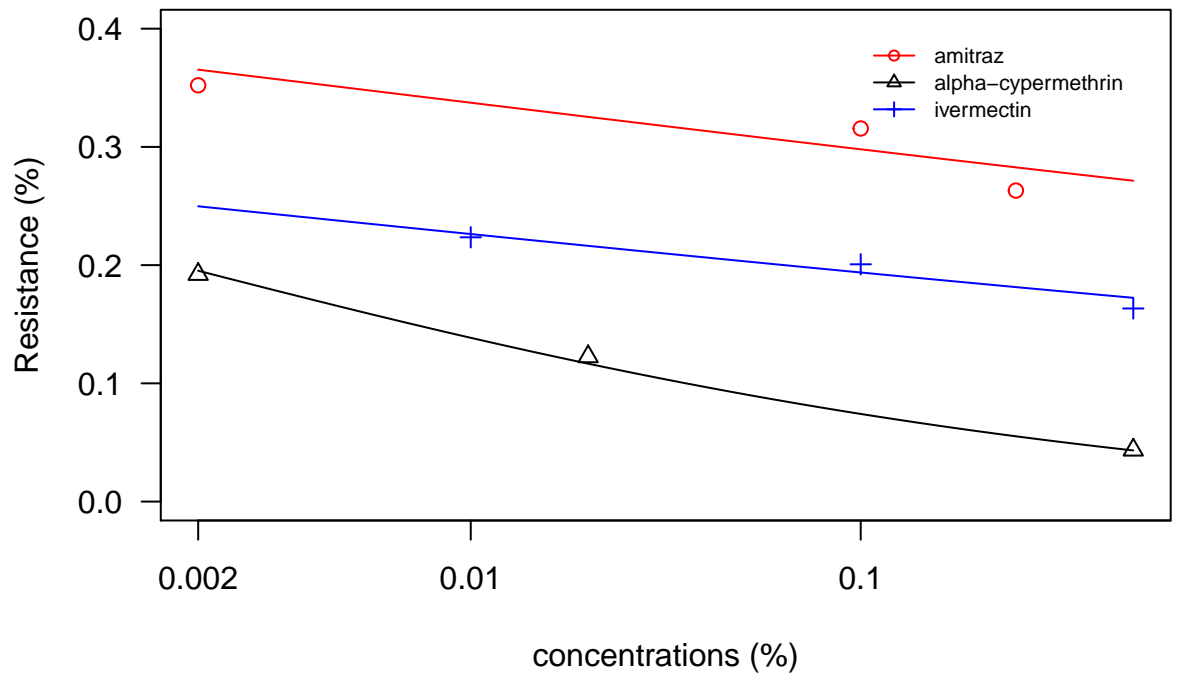

Supplement: pone.0174652.s001.pdf [file pone.0174652.s001.pdf]
